# Supplementary material
Source: Springer Nature journal article supplement (https://www.springermedizin.de/resource/supplementary/13054_2012_678_MOESM5_ESM.pdf/9708996)

| Study                    | Telemedicine |              | Control    |             | Weight        | Risk Ratio<br>[95% CI]   |
|--------------------------|--------------|--------------|------------|-------------|---------------|--------------------------|
|                          | Events       | Total        | Events     | Total       |               |                          |
| <b>Higher quality</b>    |              |              |            |             |               |                          |
| Rosenfeld et al., 2000   | 3            | 201          | 29         | 427         | 2.7%          | 0.22 [0.07, 0.71]        |
| Marcin et al., 2004      | 1            | 47           | 5          | 249         | 0.9%          | 1.06 [0.13, 8.87]        |
| Thomas et al., 2009      | 165          | 2108         | 188        | 2034        | 24.7%         | 0.85 [0.69, 1.03]        |
| McCambridge et al., 2010 | 110          | 959          | 151        | 954         | 23.0%         | 0.72 [0.58, 0.91]        |
| Morrison et al., 2010    | 208          | 2717         | 91         | 1371        | 22.4%         | 1.15 [0.91, 1.46]        |
| Lilly et al., 2011       | 410          | 4761         | 164        | 1529        | 26.4%         | 0.80 [0.68, 0.95]        |
| <b>Total</b>             | <b>897</b>   | <b>10793</b> | <b>628</b> | <b>6564</b> | <b>100.0%</b> | <b>0.83 [0.68, 1.02]</b> |

**Overall effect: p=0.08; heterogeneity:  $I^2=64%$**

|                      |            |             |            |             |               |                          |
|----------------------|------------|-------------|------------|-------------|---------------|--------------------------|
| <b>Lower quality</b> |            |             |            |             |               |                          |
| Breslow et al., 2004 | 47         | 744         | 120        | 1396        | 35.2%         | 0.73 [0.53, 1.02]        |
| Kohl et al., 2007    | 81         | 2622        | 16         | 189         | 29.7%         | 0.36 [0.22, 0.61]        |
| Vespa et al., 2007   | 70         | 640         | 58         | 578         | 35.1%         | 1.09 [0.78, 1.52]        |
| <b>Total</b>         | <b>198</b> | <b>4006</b> | <b>194</b> | <b>2163</b> | <b>100.0%</b> | <b>0.69 [0.40, 1.19]</b> |

**Overall effect: p=0.18; heterogeneity:  $I^2=84%$**

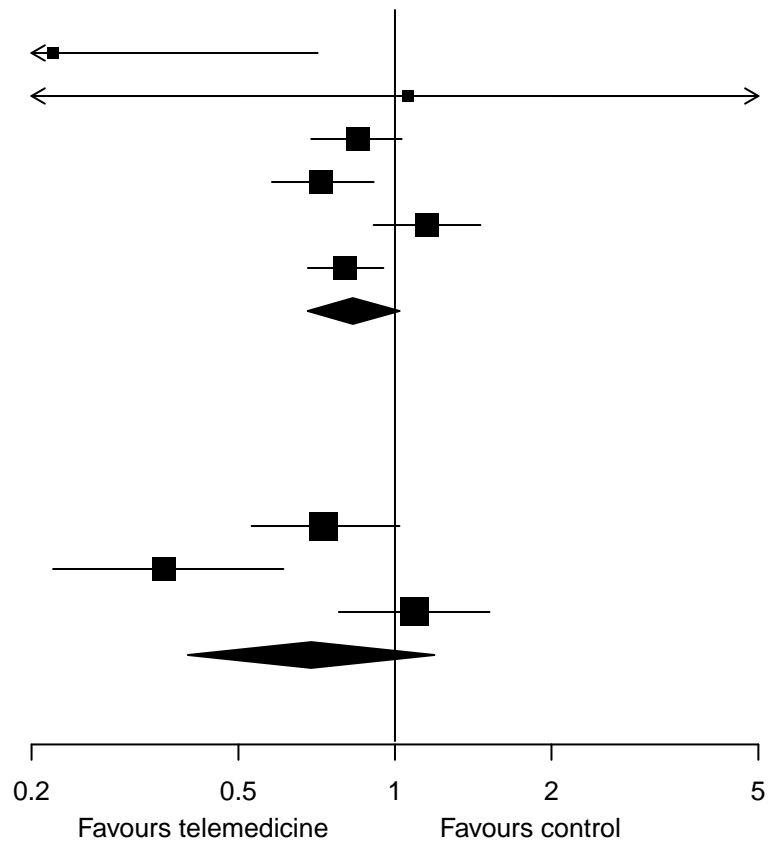

Supplement: MOESM5 [file 9708996]
